# Supplementary figures and images for: Branchial FXYD protein expression in response to salinity change and its interaction with Na+/K+-ATPase of the euryhaline teleost Tetraodon nigroviridis
Source: Oxford University Press journal article supplement (doi:10.1242/jeb.018440), 2008-11-14

m

M

C

130 —

95 —

72 —

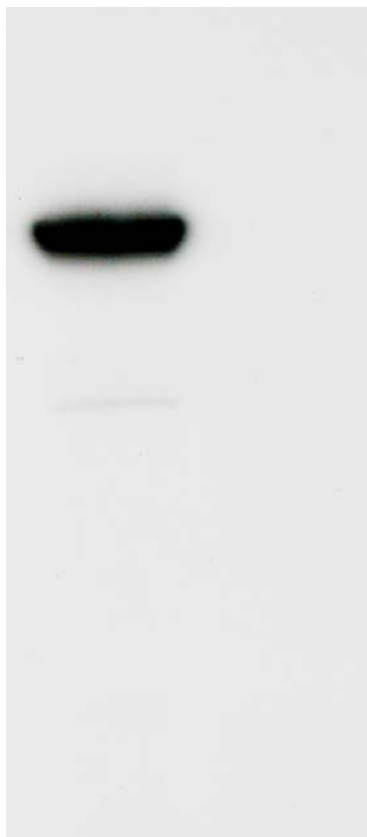

Supplement: jeb018440-sup-018440-figs1.pdf [file jeb018440-sup-018440-figs1.pdf]
